# Supplementary material
Source: Research Square preprint supplement (doi:10.21203/rs.3.rs-8988612/v1)
Supplement: Supplementary file 1 [file 305e666e30aea87ceb529dd2.docx]

**Engagement with an LMS-based tobacco harm reduction and smoking cessation program among frontline healthcare workers in Malawi: threshold adoption dynamics and determinants**

**Supplementary Table S1. Univariable logistic regression predicting full completion (5/5 modules)**

| **Variable** | **Crude OR** | **95% CI** | **p-value** |
| --- | --- | --- | --- |
| Female (vs Male) | 1.443 | 0.890-2.340 | 0.136 |
| Clinician (vs Nurse) | 0.901 | 0.489-1.658 | 0.738 |
| HSA (vs Nurse) | 0.597 | 0.332-1.072 | 0.084 |
| Urban (vs Rural) | 1.059 | 0.655-1.714 | 0.814 |
| Mzimba North (vs Lilongwe) | 0.842 | 0.520-1.366 | 0.487 |
| 30–39 years (vs <30) | 0.615 | 0.329-1.149 | 0.127 |
| 40–49 years (vs <30) | 0.370 | 0.173-0.793 | 0.011 |
| 50+ years (vs <30) | 0.115 | 0.034-0.385 | <0.001 |
| Age (continuous, per year) | 0.940 | 0.909-0.971 | <0.001 |
| Certificate (vs Diploma) | 0.722 | 0.368-1.417 | 0.344 |
| Degree (vs Diploma) | 0.840 | 0.405-1.741 | 0.639 |
| MSCE (vs Diploma) | 0.614 | 0.332-1.138 | 0.122 |
| 5–9 years (vs <5) | 1.246 | 0.665-2.335 | 0.493 |
| 10–19 years (vs <5) | 0.796 | 0.433-1.461 | 0.461 |
| 20+ years (vs <5) | 0.512 | 0.214-1.227 | 0.134 |
| Years of experience (continuous, per year) | 0.964 | 0.933-0.996 | 0.026 |

*OR = odds ratio; CI = confidence interval; HSA = Health Surveillance Assistant; MSCE = Malawi School Certificate of Education. Outcome: full completion (completion of all five modules). Crude models were estimated separately for each predictor.*

**Supplementary Table S2. LMS engagement outcomes by age group**

| **Age group** | **n** | **Mean modules** | **SD** | **Median** | **Mean quizzes** | **SD** | **n (completers)** | **Mean days/module*** |
| --- | --- | --- | --- | --- | --- | --- | --- | --- |
| <30 | 64 | 3.20 | 2.27 | 5 | 7.83 | 3.66 | 46 | 1.77 |
| 30–39 | 131 | 2.45 | 2.26 | 2 | 6.70 | 4.00 | 83 | 2.19 |
| 40–49 | 51 | 2.10 | 2.16 | 1 | 6.43 | 3.92 | 31 | 1.92 |
| 50+ | 21 | 1.00 | 1.58 | 0 | 4.29 | 3.95 | 9 | 3.32 |

*Modules and quizzes range from 0-5. ‘n (completers)’ denotes participants who completed all five modules. *Mean days/module calculated among participants completing ≥1 module.*

**Supplementary Table S3. Crude and adjusted odds ratios for key predictors of full completion**

| **Variable** | **Crude OR (95% CI)** | **Adjusted OR (95% CI)** | **p-value (adjusted)** |
| --- | --- | --- | --- |
| 30–39 vs <30 | 0.615 (0.329-1.149) | 0.479 (0.235-0.976) | 0.043 |
| 40–49 vs <30 | 0.370 (0.173-0.793) | 0.220 (0.080-0.601) | 0.003 |
| 50+ vs <30 | 0.115 (0.034-0.385) | 0.063 (0.014-0.282) | <0.001 |
| 10–19 yrs vs <5 | 0.796 (0.433-1.461) | 1.990 (0.898-4.405) | 0.090 |

*OR = odds ratio; CI = confidence interval. Outcome: full completion (completion of all five modules). Adjusted model includes gender, cadre, district, age group, and experience group entered simultaneously in a multivariable logistic model.*
